# Supplementary material
Source: MDPI journal article supplement (https://www.mdpi.com/2079-9284/10/1/2)
Supplement: s1 [file s1]

*Supplementary Material*

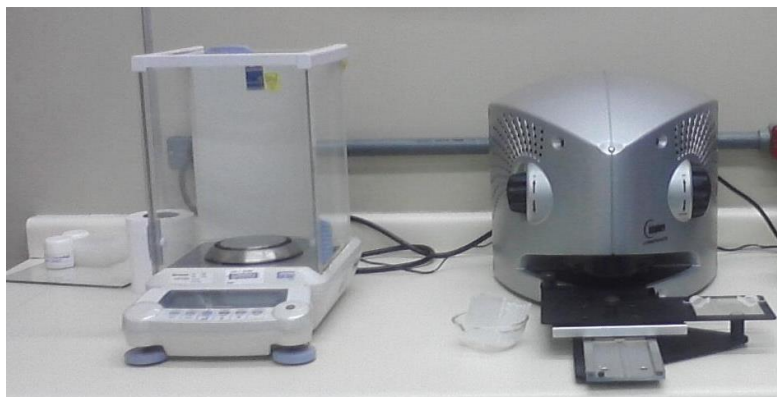

**Figure S1.** Diffuse reflectance spectrophotometer with integrating sphere from de Laboratory of Cosmetology, Faculty of Pharmaceutical Sciences, University of São Paulo [18].
